# Supplementary material
Source: Springer Nature journal article supplement (https://publikationen.ub.uni-frankfurt.de/files/7207/12943_2009_465_MOESM3_ESM.PDF)
Supplement: MOESM3 [file 12943_2009_465_MOESM3_ESM.PDF]

**Additional file 3.** Angiogenesis-related genes that are differentially expressed between the parental chemosensitive UKF-NB-3 neuroblastoma cell line and the cisplatin-resistant sub-line UKF-NB-3<sup>rCDDP</sup><sup>1000</sup> as indicated by PANTHER pathway analysis of gene microarray (AB1700) expression data.

| <b>Comparison UKF-NB-3<sup>rCDDP</sup><sup>1000</sup> versus UKF-NB-3</b> |                                                                                                                                                 |                                                                                                                                           |
|---------------------------------------------------------------------------|-------------------------------------------------------------------------------------------------------------------------------------------------|-------------------------------------------------------------------------------------------------------------------------------------------|
| Gene ID                                                                   | Encoded protein                                                                                                                                 | Fold change UKF-NB-3 <sup>rCDDP</sup> <sup>1000</sup> /UKF-NB-3 (multiple-testing corrected p-value based on three biological replicates) |
| ARHGAP8                                                                   | Rho GTPase activating protein 8                                                                                                                 | 24.21 (0.041)                                                                                                                             |
| FGFR2                                                                     | FGF receptor 2                                                                                                                                  | 11.66 (0.047)                                                                                                                             |
| WNT2B                                                                     | wingless-type MMTV integration site family, member 2B;<br>Wnt-2b;<br>wingless-type MMTV integration site family, member 13;<br>WNT13;<br>Wnt-13 | 7.36 (0.043)                                                                                                                              |
| DLL1                                                                      | delta-like 1 (Drosophila);                                                                                                                      | 6.70 (0.049)                                                                                                                              |
| WNT10B                                                                    | wingless-type MMTV integration site family, member 10B;<br>WNT-10B protein                                                                      | 5.37 (0.049)                                                                                                                              |
| RRAS                                                                      | R-Ras                                                                                                                                           | 5.26 (0.040)                                                                                                                              |
| PDGFRB                                                                    | platelet-derived growth factor receptor beta; PDGFR $\beta$                                                                                     | 5.03 (0.043)                                                                                                                              |
| DLL4                                                                      |                                                                                                                                                 | 1.59 (0.037)                                                                                                                              |
| PAK7                                                                      | Serine/threonine-protein kinase PAK 7;<br>p21(CDKN1A)-activated kinase 7;<br>p21-activated kinase 7;<br>PAK-7                                   | 0.10 (0.049)                                                                                                                              |

|       |                                                                                                                                                                                       |              |
|-------|---------------------------------------------------------------------------------------------------------------------------------------------------------------------------------------|--------------|
|       | protein kinase PAK5;<br>PAK5;<br>PAK-5                                                                                                                                                |              |
| GRB10 | growth factor receptor-bound protein 10;<br>Grb-10<br>GRB10 adaptor protein;<br>Insulin receptor-binding protein GRB-IR;<br>GRB-IR;<br>GRBIR;<br>maternally expressed gene 1;<br>MEG1 | 0.03 (0.046) |
